# Supplementary material
Source: publisher site journal article supplement (https://www.dovepress.com/article/334541)
Supplement: Supplementary file 1 [file get_supplementary_file.php]

**Supplementary Figure 1**

**
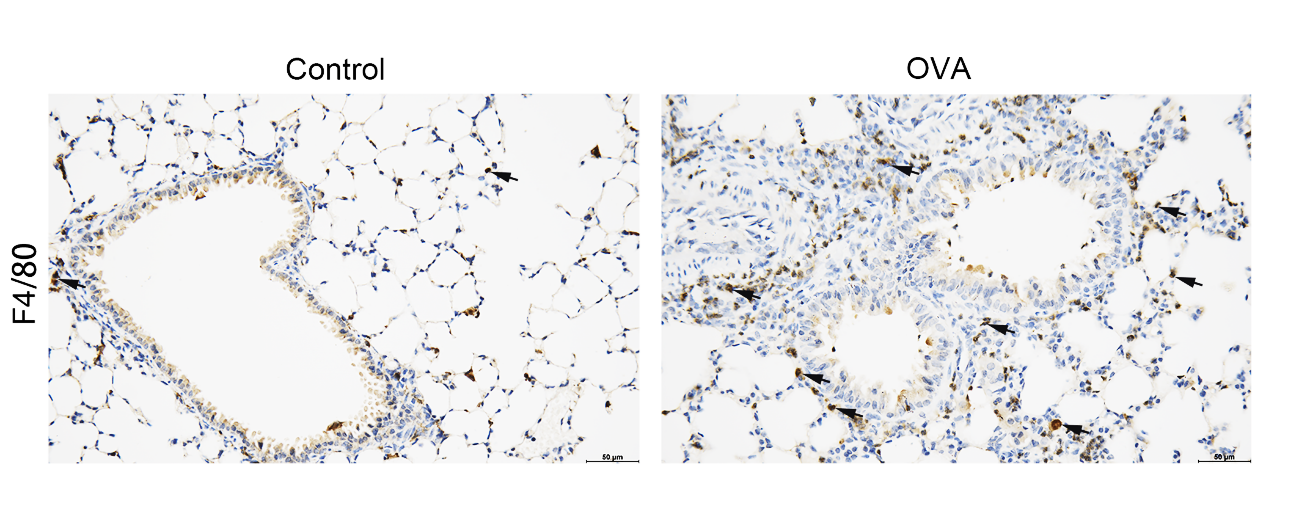
**

**Figure S1** The changes of macrophages in the lung between control and OVA-challenged mice.

Representative lung sections showing the immunohistological staining of F4/80 in mice from control and OVA group, the scale bar is 50 μm. Black arrows indicated immunoreactive staining.
